# Supplementary material
Source: publisher site journal article supplement (https://www.spandidos-publications.com/982/downloadSupplementary)

Figure S1. Ad-HIF-1 $\alpha$  treatment upregulates HIF-1 $\alpha$  expression following MCAO. (A) Western blot analysis was performed for HIF-1 $\alpha$  and  $\beta$ -actin. (B) Ad-HIF-1 $\alpha$  treatment significantly increased HIF-1 $\alpha$  protein levels  $\sim$ 3.4 fold. #P<0.05. MCAO, middle cerebral artery occlusion; Ad, adenovirus; HIF-1 $\alpha$ , hypoxia-inducible factor-1 $\alpha$ .

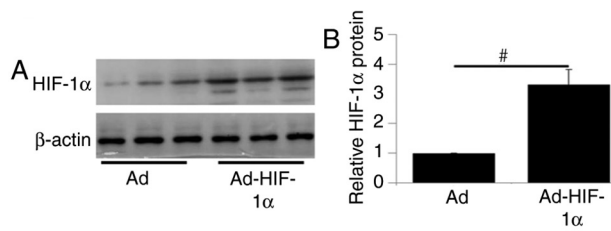

Supplement: Supplementary file 1 [file downloadSupplementary]
